# Supplementary material for: Polyvinylidene Fluoride Surface Polarization Enhancement for Liquid-Solid Triboelectric Nanogenerator and Its Application
Source: MDPI journal article supplement (doi:10.3390/polym14050960), 2022-02-28
Supplement: s1 [file s1]

Supplementary Material

# Polyvinylidene Fluoride Surface Polarization Enhancement for Liquid-Solid Triboelectric Nanogenerator and Its Application

Duy Linh Vu, Chau Duy Le and Kyoung Kwan Ahn \*

Fluid Power & Machine Intelligence (FPMI) Laboratory, School of Mechanical Engineering, University of Ulsan, 93, Daehak-ro, Nam-gu, Ulsan 44610, South Korea; vuduylinhbk@gmail.com (D.L.V); lechauduy@gmail.com (C.D.L); kkahn@ulsan.ac.kr (K.K.A)

\* Correspondence: kkahn@ulsan.ac.kr

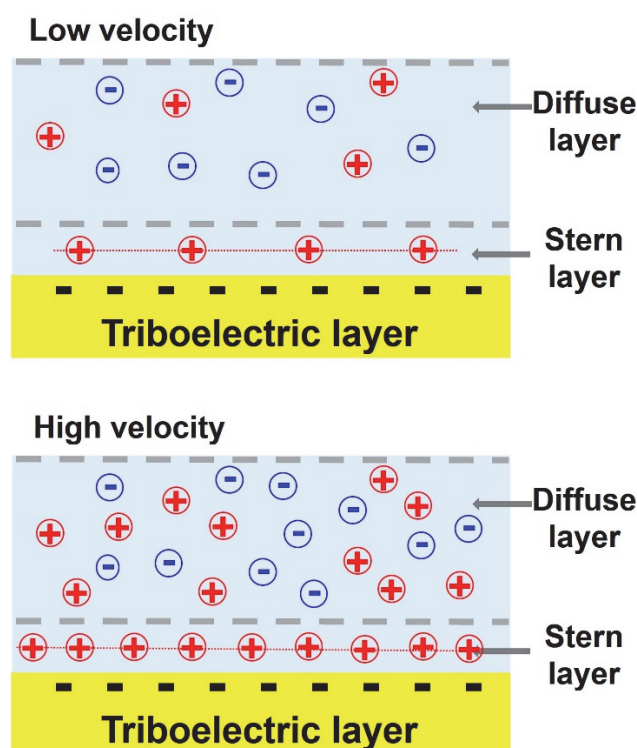

**Figure S1.** Schematic diagram depicting the change in the EDL at a triboelectric layer in aqueous solution in different velocity

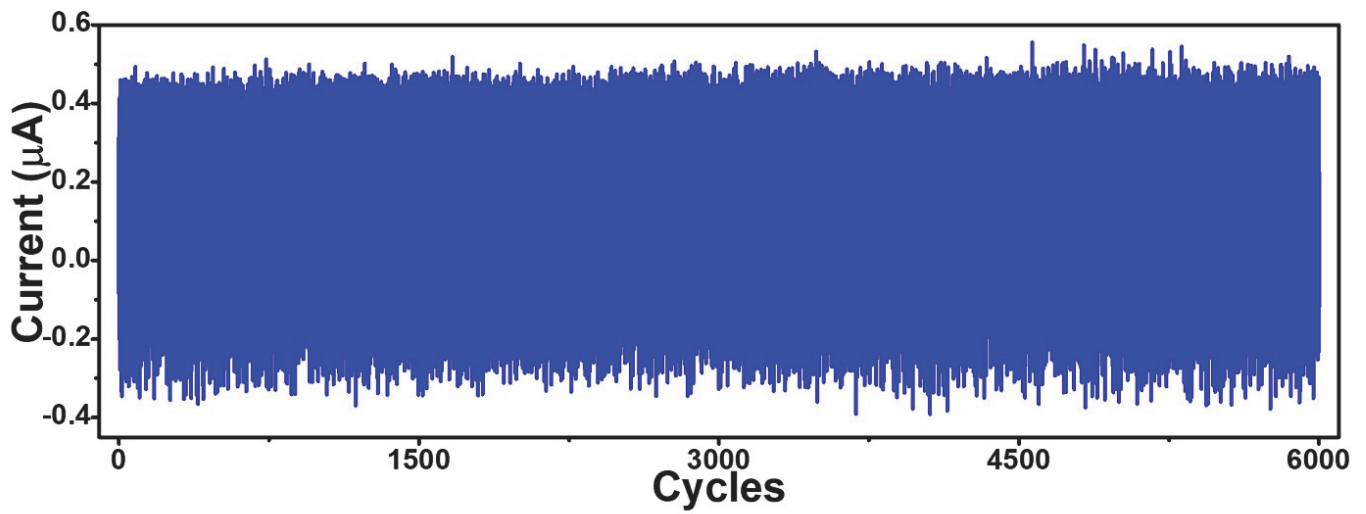

**Figure S2.** The stability of PSPE-TENG operated at a flow rate of 3 ml/s for about 6,000 cycles

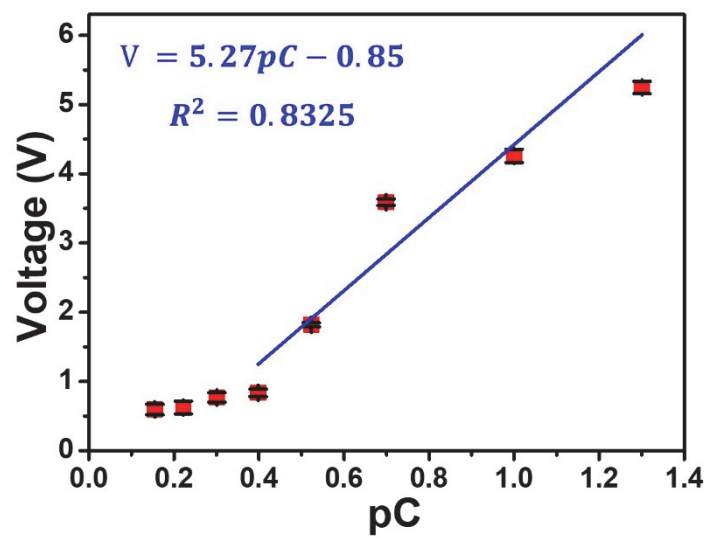

**Figure S3.** The regression analysis of pC based on the output voltage
